# Supplementary material for: Proteomic Study of Broiler Plasma Supplemented with Different Levels of Copper and Manganese from Different Sources
Source: MDPI journal article supplement (doi:10.3390/molecules28248155), 2023-12-18
Supplement: s1 [file s1]

## SUPPLEMENTARY MATERIAL

### **Proteomic study of broiler plasma supplemented with different levels of copper and manganese from different sources**

Renata Aparecida Martins<sup>a\*</sup>, Andrey Sávio de Almeida Assunção<sup>a</sup>, José Cavalcante Souza Vieira<sup>b</sup>, Leone Campos Rocha<sup>a</sup>, Priscila Michelin Groff Urayama<sup>a</sup>, Marília Afonso Rabelo Buzalaf<sup>c</sup>, José Roberto Sartori<sup>a</sup>, Pedro de Magalhães Padilha<sup>b\*</sup>

*<sup>a</sup>School of Veterinary Medicine and Animal Science, São Paulo State University (UNESP), Botucatu, São Paulo, Brazil.*

*<sup>b</sup>Institute of Biosciences, São Paulo State University (UNESP), Botucatu, São Paulo, Brazil.*

*<sup>c</sup>University of São Paulo, (USP), Bauru, Brazil.*

#### **\*Corresponding author**

Renata Aparecida Martins, School of Veterinary Medicine and Animal Science, São Paulo State University (UNESP), Street Prof. Dr. Walter Mauricio Correa, w/n Botucatu, São Paulo, 18618-681, Brazil. E-mail: renata.a.martins@unesp.br

Pedro de Magalhães Padilha, Institute of Biosciences, São Paulo State University, Street Prof. Dr. Antonio Celso Wagner Zanin, 250, Botucatu, São Paulo, 18618-693, Brazil. E-mail: pedro.padilha@unesp.br

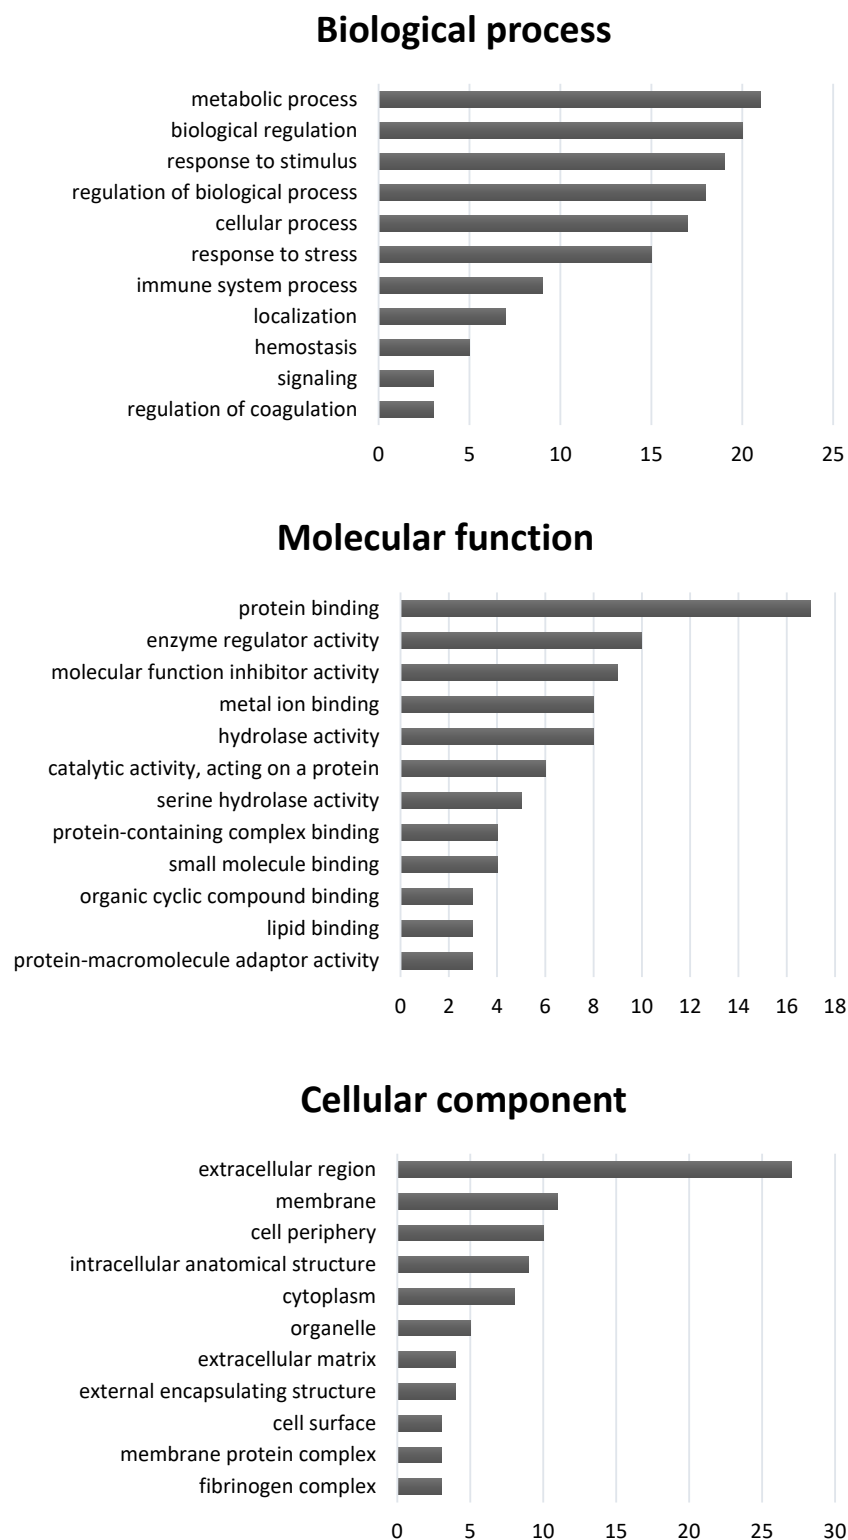

**Supplementary Figure S1.** Genetic ontology analysis of the plasma proteome of broiler chickens supplemented with different levels and sources of copper and manganese using Blast2GO.

**Supplementary Table S1.** Proteins characterized in protein spots differentially expressed in polyacrylamide gels from pools of plasma from broilers supplemented with two sources (sulfates (S) and hydroxychlorides (H)) and two levels of copper (15 and 150 mg kg<sup>-1</sup>) and manganese (80 and 120 mg kg<sup>-1</sup>).

| Spot ID | Acession    | Gene         | Protein                                                                             | pI/MM (Da)<br>Theoretical | Score    | H15-80<br><i>versus</i><br>S15-80 | H150-120<br><i>versus</i><br>S150-120 | H150-120<br><i>versus</i><br>H15-80 | S150-120<br><i>versus</i><br>S15-80 |
|---------|-------------|--------------|-------------------------------------------------------------------------------------|---------------------------|----------|-----------------------------------|---------------------------------------|-------------------------------------|-------------------------------------|
| 3       | R9PXM5      | N/A          | Immunoglobulin lambda like polypeptide 1                                            | 6.09/ 11417.69            | 2343.459 |                                   |                                       | -1.362/+1.362                       |                                     |
|         | A0A3Q2UD C8 | N/A          | Ig-like domain-containing protein                                                   | 4.99/ 9762.55             | 738.1473 |                                   |                                       | -1.362/+1.362                       |                                     |
| 13      | O93601      | apoAIV       | Apolipoprotein AIV                                                                  | 4.80/ 40852.86            | 1734.531 |                                   |                                       |                                     | -1.325/+1.325                       |
| 25      | E1C7T1      | SPIA1        | Serpin peptidase inhibitor_ clade A (alpha-1 antiproteinase_ antitrypsin)_ member 1 | 6.08/ 48714.69            | 290.6664 |                                   |                                       |                                     | +1.424/-1.424                       |
|         | E1BV78      | FGG          | Fibrinogen gamma chain                                                              | 5.47/ 49954.83            | 3348.089 |                                   |                                       |                                     | +1.424/-1.424                       |
| 26      | F1P4V1      | FGA          | Fibrinogen alpha chain                                                              | 5.69/82392.35             | 2692.128 | +2.438/-2.438                     |                                       |                                     |                                     |
| 28      | F1NUL9      | FGB          | Fibrinogen beta chain                                                               | 7.85/ 55319.58            | 2491.537 |                                   | -1.478/+1.478                         |                                     |                                     |
| 31      | Q90WR3      | N/A          | Hemopexin (Fragment)                                                                | 5.92/ 29384.78            | 15930.77 |                                   | -1.740/+1.740                         |                                     |                                     |
| 38      | F1NWX6      | PLG          | Plasminogen                                                                         | 7.92/ 90764.21            | 1504.657 |                                   | -1.625/+1.625                         | -1.647/+1.647                       |                                     |
|         | Q7LZF3      | N/A          | Plasmin                                                                             | 8.29/10325.29             | 369.8466 |                                   | -1.625/+1.625                         | -1.647/+1.647                       |                                     |
| 44      | F1NUL9      | FGB          | Fibrinogen beta chain                                                               | 7.85/ 55319.58            | 1836.466 | +1.919/-1.919                     |                                       | -1.339/+1.339                       | -1.753/+1.753                       |
|         | Q9W6F5      | VTDB         | Vitamin D-binding protein                                                           | 6.47/ 53686.59            | 1368.327 | +1.919/-1.919                     |                                       | -1.339/+1.339                       | -1.753/+1.753                       |
| 48      | Q90633      | N/A          | Complement C3                                                                       | 6.69/ 184086.42           | 864.9603 |                                   |                                       |                                     | -1.328/+1.328                       |
|         | F1DQG4      | C7           | Complement component 7                                                              | 5.96/ 93012.62            | 292.7017 |                                   |                                       |                                     | -1.328/+1.328                       |
|         | A6N9E0      | C3d          | Complement component 3d (Fragment)                                                  | 9.01/ 36550.12            | 255.618  |                                   |                                       |                                     | -1.328/+1.328                       |
| 50      | A0A3Q2U3V 9 | LOC100858647 | Beta-microseminoprotein-like                                                        | 8.32/ 12421.55            | 1290.518 |                                   |                                       |                                     | -1.626/+1.626                       |
|         | Q7LZS1      | N/A          | 12K serum protein_ beta-2-m cross-reactive (Fragment)                               | 5.01/ 3974.64             | 654.4376 |                                   |                                       |                                     | -1.626/+1.626                       |
| 54      | A0A1D5NX A6 | ITIH3        | Inter-alpha-trypsin inhibitor heavy chain 3                                         | 5.58/ 72500.59            | 2022.493 |                                   |                                       |                                     | +1.373/-1.373                       |
|         | B3VE14      | ITIH2        | Inter-alpha inhibitor heavy chain 2                                                 | 6.92/ 106767.87           | 903.7598 |                                   |                                       |                                     | +1.373/-1.373                       |

|    |             |           |                                       |                 |          |               |
|----|-------------|-----------|---------------------------------------|-----------------|----------|---------------|
|    | A0A1D5PU00  | AMBP      | Protein AMBP                          | 5.59/ 38457.56  | 878.0583 | +1.373/-1.373 |
|    | A0A3Q2UF G5 | N/A       | Ig-like domain-containing protein     | 9.07/ 10384.62  | 3791.357 | -1.426/+1.426 |
| 56 | A2N881      | N/A       | VH1 protein                           | 9.10/12247.88   | 1697.29  | -1.426/+1.426 |
|    | A0A1D5NW 68 | ALB       | Albumin                               | 5.29/ 64004.39  | 767.5627 | -1.426/+1.426 |
|    | F1NJU5      | C8A       | Complement C8 alpha chain             | 6.11/ 67725.13  | 431.8983 | -1.426/+1.426 |
| 59 | A0A1I7Q422  | TTR       | Transthyretin                         | 4.97/ 18539.00  | 1194.293 | -1.349/+1.349 |
| 64 | A0A1D5PW 77 | LOC776376 | C-reactive protein_ pentraxin-related | 6.31/ 34987.04  | 1473.075 | +2.030/-2.030 |
|    | Q2EJU6      | CRP       | Pentaxin                              | 6.33/ 25660.32  | 260.4364 | +2.030/-2.030 |
| 67 | F1NW43      | PKLR      | Pyruvate kinase                       | 7.97/ 57873.81  | 2774.254 | +1.802/-1.802 |
|    | F1NUL9      | FGB       | Fibrinogen beta chain                 | 7.85/ 55319.58  | 1133.725 | +1.802/-1.802 |
|    | F1NUL9      | FGB       | Fibrinogen beta chain                 | 7.85/ 55319.58  | 2847.544 | +2.262/-2.262 |
|    | F1NW43      | PKLR      | Pyruvate kinase                       | 7.97/ 57873.81  | 1418.43  | +2.262/-2.262 |
| 68 | A0A1D5PN U2 | APOH      | Beta-2-glycoprotein 1                 | 8.60/ 41093.29  | 361.6708 | +2.262/-2.262 |
|    | F1P4V1      | FGA       | Fibrinogen alpha chain                | 5.69/82392.35   | 247.5071 | +2.262/-2.262 |
|    | A0A3Q2UF G5 | N/A       | Ig-like domain-containing protein     | 9.07/ 10384.62  | 4344.046 | +2.414/-2.414 |
| 70 | A0A1D5NW 68 | ALB       | Albumin                               | 5.29/ 64004.39  | 3554.366 | +2.414/-2.414 |
|    | A2N881      | N/A       | VH1 protein                           | 9.10/12247.88   | 2203.052 | +2.414/-2.414 |
|    | F1ND07      | PSME4     | Proteasome activator subunit 4        | 6.67/ 209793.34 | 162.0611 | +2.414/-2.414 |
|    | A0A3Q2UF G5 | N/A       | Ig-like domain-containing protein     | 9.07/ 10384.62  | 1259.289 | +5.128/-5.128 |
| 71 | A0A1D5NW 68 | ALB       | Albumin                               | 5.29/ 64004.39  | 658.7015 | +5.128/-5.128 |
|    | A2N881      | N/A       | VH1 protein                           | 9.10/12247.88   | 886.9579 | +5.128/-5.128 |
| 72 | Q4ADJ7      | TFEW      | Ovotransferrin                        | 6.85/ 77831.61  | 12703.08 | -1.394/+1.394 |
| 73 | A0A3Q2UF G5 | N/A       | Ig-like domain-containing protein     | 9.07/ 10384.62  | 4764.221 | -1.439/+1.439 |

|     |             |              |                                                       |                 |          |               |
|-----|-------------|--------------|-------------------------------------------------------|-----------------|----------|---------------|
|     | A2N881      | N/A          | VH1 protein                                           | 9.10/12247.88   | 1486.285 | -1.439/+1.439 |
| 75  | F1NWX6      | PLG          | Plasminogen                                           | 7.92/ 90764.21  | 1435.87  | +1.741/-1.741 |
|     | Q7LZF3      | N/A          | Plasmin                                               | 8.29/10325.29   | 580.665  | +1.741/-1.741 |
| 79  | A0A3Q2U3V9  | LOC100858647 | Beta-microseminoprotein-like                          | 8.32/ 12421.55  | 689.0574 | +1.382/-1.382 |
|     | Q7LZS1      | N/A          | 12K serum protein_ beta-2-m cross-reactive (Fragment) | 5.01/ 3974.64   | 515.8345 | +1.382/-1.382 |
| 98  | A0A1D5NW68  | ALB          | Albumin                                               | 5.29/ 64004.39  | 6786.945 | +2.293/-2.293 |
| 100 | A0A1L1RIW5  | KRT8         | Keratin 8                                             | 5.79/ 60513.22  | 151.5625 | -2.011/+2.011 |
| 104 | A0A1D5PN U2 | APOH         | Beta-2-glycoprotein 1                                 | 8.60/ 41093.29  | 3404.912 | -1.507/+1.507 |
|     | F1NUL9      | FGB          | Fibrinogen beta chain                                 | 7.85/ 55319.58  | 3101.555 | -1.507/+1.507 |
|     | F1P4V1      | FGA          | Fibrinogen alpha chain                                | 5.69/82392.35   | 2380.485 | -1.507/+1.507 |
|     | F1NW43      | PKLR         | Pyruvate kinase                                       | 7.97/ 57873.81  | 363.0029 | -1.507/+1.507 |
|     | A0A1L1RIW5  | KRT8         | Keratin 8                                             | 5.79/ 60513.22  | 347.331  | -1.507/+1.507 |
| 105 | E1BV78      | FGG          | Fibrinogen gamma chain                                | 5.47/ 49954.83  | 19501.08 | -1.909/+1.909 |
|     | A0A1D5NW68  | ALB          | Albumin                                               | 5.29/ 64004.39  | 1006.718 | -1.909/+1.909 |
|     | F1ND07      | PSME4        | Proteasome activator subunit 4                        | 6.67/ 209793.34 | 171.9035 | -1.909/+1.909 |
| 106 | Q98TD1      | PIT 54       | PIT 54                                                | 4.61/50821.51   | 9397.017 | -1.308/+1.308 |
|     | A0A3Q2UF48  |              | Peptidase S1 domain-containing protein                | 6.30/20380.13   | 862.9152 | -1.308/+1.308 |
|     | E1BV78      | FGG          | Fibrinogen gamma chain                                | 5.47/ 49954.83  | 315.1335 | -1.308/+1.308 |
|     | A0A1D5NW68  | ALB          | Albumin                                               | 5.29/ 64004.39  | 124.195  | -1.308/+1.308 |
| 107 | A0A3Q2UF G5 | N/A          | Ig-like domain-containing protein                     | 9.07/ 10384.62  | 989.2745 | -2.109/+2.109 |
| 108 | F1NAR5      | SERPINF2     | Serpin family F member 2                              | 4.84/ 56973.56  | 934.6506 | -1.703/+1.703 |
|     | A0A1L1RIW5  | KRT8         | Keratin 8                                             | 5.79/ 60513.22  | 284.1509 | -1.703/+1.703 |

|                                                                                                                                                                                                                                                                                                                                                                                   |             |         |                                                |                |          |               |
|-----------------------------------------------------------------------------------------------------------------------------------------------------------------------------------------------------------------------------------------------------------------------------------------------------------------------------------------------------------------------------------|-------------|---------|------------------------------------------------|----------------|----------|---------------|
| 111                                                                                                                                                                                                                                                                                                                                                                               | F1NK40      | A2ML4   | Alpha-2-macroglobulin-like 4                   | 5.98/163338.74 | 243.638  | -1.425/+1.425 |
|                                                                                                                                                                                                                                                                                                                                                                                   | E1BV78      | FGG     | Fibrinogen gamma chain                         | 5.47/ 49954.83 | 203.0988 | -1.425/+1.425 |
|                                                                                                                                                                                                                                                                                                                                                                                   | H1AC38      | N/A     | A2M_recep domain-containing protein (Fragment) | 6.15/ 30756.72 | 114.814  | -1.425/+1.425 |
| 112                                                                                                                                                                                                                                                                                                                                                                               | Q90WR3      | N/A     | Hemopexin (Fragment)                           | 5.92/ 29384.78 | 1525.618 | -2.550/+2.550 |
|                                                                                                                                                                                                                                                                                                                                                                                   | A0A1D5PEU 7 | VNN1    | Vanin 1                                        | 5.17/ 54664.46 | 613.8879 | -2.550/+2.550 |
|                                                                                                                                                                                                                                                                                                                                                                                   | Q5ZHM4      | RCJMB04 | CN hydrolase domain-containing protein         | 6.33/ 55399.28 | 595.0783 | -2.550/+2.550 |
| S15-80 (15 mg kg <sup>-1</sup> Cu sulfate and 80 mg kg <sup>-1</sup> Mn sulfate), S150-120 (150 mg kg <sup>-1</sup> Cu sulfate and 120 mg kg <sup>-1</sup> Mn sulfate), H15-80 (15 mg kg <sup>-1</sup> Cu hydroxychloride and 80 mg kg <sup>-1</sup> Mn hydroxychloride) and H150-120 (150 mg kg <sup>-1</sup> Cu hydroxychloride and 120 mg kg <sup>-1</sup> Mn hydroxychloride) |             |         |                                                |                |          |               |

**Supplementary Table S2.** Significantly enriched pathways (FDR<0.05) using the Reactome pathway database.

| Pathway identifier | Pathway name                                                                                                                | FDR      | Gene                                                         |
|--------------------|-----------------------------------------------------------------------------------------------------------------------------|----------|--------------------------------------------------------------|
| R-GGA-114608       | Platelet degranulation                                                                                                      | 7.93E-07 | FGA; FGG; FGB; PLG; APOH; ALB; SERPINF2; SPIA1; ITIH3        |
| R-GGA-76005        | Response to elevated platelet cytosolic Ca <sup>2+</sup>                                                                    | 7.93E-07 | FGA; FGG; FGB; PLG; APOH; ALB; SERPINF2; SPIA1; ITIH3        |
| R-GGA-76002        | Platelet activation, signaling and aggregation                                                                              | 2.08E-04 | FGA; FGG; FGB; PLG; APOH; ALB; SERPINF2; SPIA1; ITIH3        |
| R-GGA-140875       | Common Pathway of Fibrin Clot Formation                                                                                     | 2.29E-04 | FGA; FGG; FGB; SPIA1                                         |
| R-GGA-109582       | Hemostasis                                                                                                                  | 5.85E-04 | FGA; FGG; IGLL1; FGB; PLG; APOH; ALB; SERPINF2; SPIA1; ITIH3 |
| R-GGA-140877       | Formation of Fibrin Clot (Clotting Cascade)                                                                                 | 9.68E-04 | FGA; FGG; FGB; SPIA1                                         |
| R-GGA-372708       | p130Cas linkage to MAPK signaling for integrins                                                                             | 9.75E-04 | FGA; FGG; FGB                                                |
| R-GGA-354194       | GRB2:SOS provides linkage to MAPK signaling for Integrins                                                                   | 9.75E-04 | FGA; FGG; FGB                                                |
| R-GGA-2132281      | Regulation of complement cascades                                                                                           | 9.75E-04 | C7; C3; C8A                                                  |
| R-GGA-5686938      | Regulation of TLR by endogenous ligand                                                                                      | 0.00261  | FGA; FGG; FGB                                                |
| R-GGA-2168880      | Scavenging of heme from plasma                                                                                              | 0.00284  | IGLL1; AMBP; ALB; Ig-like domain-containing protein          |
| R-GGA-2173782      | Binding and Uptake of Ligands by Scavenger Receptors                                                                        | 0.00374  | IGLL1; AMBP; ALB; Ig-like domain-containing protein          |
| R-GGA-75205        | Dissolution of Fibrin Clot                                                                                                  | 0.00374  | PLG; SERPINF2                                                |
| R-GGA-2132285      | Complement Cascade                                                                                                          | 0.00374  | C7; C3; C8A                                                  |
| R-GGA-5674135      | MAP2K and MAPK activation                                                                                                   | 0.00456  | FGA; FGG; FGB                                                |
| R-GGA-2132267      | Formation of membrane attack complex (MAC)                                                                                  | 0.00459  | C7; C8A                                                      |
| R-GGA-166658       | Complement cascade                                                                                                          | 0.00460  | IGLL1; C8A; CRP; Ig-like domain-containing protein           |
| R-GGA-354192       | Integrin signaling                                                                                                          | 0.00737  | FGA; FGG; FGB                                                |
| R-GGA-216083       | Integrin cell surface interactions                                                                                          | 0.00737  | FGA; FGG; FGB                                                |
| R-GGA-173623       | Classical antibody-mediated complement activation                                                                           | 0.00737  | IGLL1; CRP; Ig-like domain-containing protein                |
| R-GGA-8957275      | Post-translational protein phosphorylation                                                                                  | 0.00737  | FGA; FGG; ALB; ITIH2                                         |
| R-GGA-381426       | Regulation of Insulin-like Growth Factor (IGF) transport and uptake by Insulin-like Growth Factor Binding Proteins (IGFBPs) | 0.00895  | FGA; FGG; ALB; ITIH2                                         |
| R-GGA-9757110      | Prednisone ADME                                                                                                             | 0.00928  | ALB; SPIA1                                                   |
| R-GGA-166786       | Creation of C4 and C2 activators                                                                                            | 0.00929  | IGLL1; CRP; Ig-like domain-containing protein                |
| R-GGA-76009        | Platelet Aggregation (Plug Formation)                                                                                       | 0.01037  | FGA; FGG; FGB                                                |
| R-GGA-166663       | Initial triggering of complement                                                                                            | 0.01074  | IGLL1; CRP; Ig-like domain-containing protein                |
| R-GGA-8963899      | Plasma lipoprotein remodeling                                                                                               | 0.02497  | PLG; ALB                                                     |
| R-GGA-2132287      | Creation of alternative pathway C3 convertase                                                                               | 0.02497  | C3                                                           |
| R-GGA-2132293      | Formation of fluid-phase convertase C3                                                                                      | 0.02497  | C3                                                           |

|               |                                                   |         |                                                                                   |
|---------------|---------------------------------------------------|---------|-----------------------------------------------------------------------------------|
| R-GGA-2132273 | Formation of membrane-bound<br>convertase C3      | 0.02497 | C3                                                                                |
| R-GGA-2422406 | Innate Immune System                              | 0.02879 | C7; C3; C8A                                                                       |
| R-GGA-2173345 | Anaphylatoxins initiate<br>inflammatory responses | 0.03735 | C3                                                                                |
| R-GGA-9793528 | Ciprofloxacin ADME                                | 0.03735 | ALB                                                                               |
| R-GGA-168249  | Innate Immune System                              | 0.03915 | FGA; FGG; FGB; IGLL1; TTR; C8A; SPIA1; CRP; Ig-<br>like domain-containing protein |
| R-GGA-1474244 | Extracellular matrix organization                 | 0.04035 | FGA; FGG; FGB; PLG                                                                |
| R-GGA-2029481 | FCGR activation                                   | 0.04372 | IGLL1; Ig-like domain-containing protein                                          |
